# Supplementary material for: Real-Time Brain Monitoring by Near-Infrared Spectroscopy Predicts Neurological Outcome after Cardiac Arrest and Resuscitation in Rats: A Proof of Concept Study of a Novel Prognostic Measure after Cardiac Arrest
Source: MDPI journal article supplement (doi:10.3390/jcm11010131), 2021-12-27
Supplement: s1 [file s1]

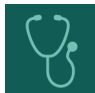

**Table S1.** The assay IDs and primer sequences for each gene.

| Gene Name     | Assay ID      | Primer Sequence                                                                                                                   |
|---------------|---------------|-----------------------------------------------------------------------------------------------------------------------------------|
| IL-1b         | Rn00580432_m1 |                                                                                                                                   |
| IL-6          | Rn01410330_m1 |                                                                                                                                   |
| HMGB1         | Rn02377062_g1 |                                                                                                                                   |
| DNM1L         | Rn00586466_m1 |                                                                                                                                   |
| FIS1          | Rn01480911_m1 |                                                                                                                                   |
| MIEF1         | Rn01502709_m1 |                                                                                                                                   |
| Gapdh         | Rn01749022_g1 |                                                                                                                                   |
| TNF- $\alpha$ | Custom Assay  | Forward Primer: CCAGGAGAAAGTCAGCCTCCT<br>Reverse Primer: TCATACCAGGGCTTGAGCTCA<br>Probe Sequence: AGAGCCCTT-<br>GCCCTAAGGACACCCCT |

IL, interleukin; HMGB, high mobility group box protein; DNML, dynamin 1 like protein; FIS1, mitochondrial fission 1 protein; MIEF1, mitochondrial elongation factor 1 protein; TNF, tumor necrosis factor.

**Table S2.** Baseline characteristics of animals among the three different CA duration groups.

|                                    | 6 min CA<br>(n = 10) | 9 min CA<br>(n = 10) | 12 min CA<br>(n = 10) | p Value |
|------------------------------------|----------------------|----------------------|-----------------------|---------|
| Weight, g                          | 444.9 $\pm$ 31.3     | 432.4 $\pm$ 26.9     | 438.2 $\pm$ 33.7      | 0.67    |
| MAP baseline, mmHg                 | 87.5 $\pm$ 16.0      | 86.4 $\pm$ 11.9      | 84.0 $\pm$ 16.1       | 0.86    |
| HR baseline, bpm                   | 265.5 $\pm$ 26.7     | 289.5 $\pm$ 22.3     | 299.6 $\pm$ 46.2      | 0.08    |
| BT baseline, °C                    | 36.5 $\pm$ 0.2       | 36.5 $\pm$ 0.3       | 36.3 $\pm$ 0.2        | 0.07    |
| EtCO <sub>2</sub> baseline, mmHg   | 39.0 $\pm$ 2.8       | 38.3 $\pm$ 3.4       | 40.1 $\pm$ 4.7        | 0.56    |
| rSO <sub>2</sub> value baseline, % | 66.6 $\pm$ 1.9       | 66.1 $\pm$ 1.3       | 67.0 $\pm$ 2.7        | 0.62    |
| Time to CA, sec                    | 180.2 $\pm$ 33.4     | 188.9 $\pm$ 19.4     | 171.5 $\pm$ 20.5      | 0.32    |
| Time to ROSC, sec                  | 66.6 $\pm$ 9.0       | 75.1 $\pm$ 10.1      | 87.4 $\pm$ 29.7       | 0.08    |

MAP, mean arterial pressure; HR, heart rate; BT, body temperature; EtCO<sub>2</sub>, end tidal carbon dioxide; rSO<sub>2</sub>, regional cerebral oxygen saturation; CA, cardiac arrest. Three groups were compared by the one-way analysis of variance.
